# Supplementary material
Source: PubMed Central journal article supplement (PMC2925990)
Supplement: NIHMS220913-supplement-1.pdf [file NIHMS220913-supplement-1.pdf]

**Supplemental Information to:**

## **Biotin Synthesis Begins by Hijacking the Fatty Acid Synthetic Pathway**

Steven Lin, Ryan E. Hanson and John E. Cronan

### **SUPPLEMENTAL METHODS**

**Construction of plasmids.** Bacterial strains, plasmids and primers are listed in Table S2. The *bioC* and *bioH* genes were PCR amplified from MG1655 genomic DNA using oligonucleotide sets A07-A08 and A11-A12, respectively. The *bioC* PCR product was digested with NcoI and XhoI whereas the *bioH* PCR products were digested with BspHI and XhoI. The DNA fragments were ligated into pET28b+ digested with NcoI and XhoI to give plasmids pSTL4 and pSTL6 carrying the *bioC* and *bioH* genes, respectively. Plasmid pSTL13 encodes a mutant version of *bioH* in which codon 82 was changed from serine to alanine by site-directed mutagenesis using oligonucleotides A39 and A40 and the QuikChange procedure (Stratagene). Plasmid pSTL20 carrying the *Bacillus subtilis bioW* gene was constructed by amplification of *bioW* from *B. subtilis* genomic DNA using oligonucleotides A41 and A55. The resulting PCR product was digested with NcoI and XhoI and ligated into pBAD322 digested with NcoI and Sall. Plasmid pCY123 which carries the entire *bio* operon (*bioABFCD*) was constructed by digestion of plasmid pLC25-23<sup>1</sup> with HindIII and EcoRI and ligation of the 6.6 kb *bio* fragment to pBR329 digested with the same enzymes. An in-frame  $\Delta bioC$  derivative of plasmid pCY123 was constructed by digestion with BglIII and religation of the plasmid, removing 46 amino acid residues between codon 24 and 70. The resulting plasmid pSTL25 complemented a  $\Delta bioD$  strain but not a  $\Delta bioC$  strain. The HindIII site lies in the phage  $\lambda att$  region (the original clone was made from a  $\lambda$  lysogen). Plasmid DNAs were extracted by QIAprep Miniprep (Qiagen). The constructs were verified by DNA sequencing conducted by the Core sequencing Facility of the Carver Biotechnology Center of University of Illinois at Urbana-Champaign.

**Construction of bacterial strains.** The strains used in this study were derivatives of the sequenced *E. coli* K-12 strain MG1655 unless stated otherwise. Chromosomal deletions of *bio* genes in strain BW25113 were constructed by the  $\lambda$  recombination system of Datsenko et al.<sup>2</sup>. The *kan* cassette was amplified from pKD13 using the following oligonucleotides A70-A71 (*bioA* deletion), A15-A16 (*bioC* deletion), A68-A69 (*bioF* deletion) and A17-A18 (*bioH* deletion). Essentially the entire center of the coding sequences of each the genes was deleted in frame leaving <20 residues at the termini. This was essential for function of the genes upstream and downstream of *bioF* and *bioC* because the coding sequences overlap. The *kan* cassette plus the flanking chromosomal segments was transduced into MG1655 using phage P1*vir* and the cassette subsequently eliminated by the FLP helper plasmid<sup>2</sup>. Strains STL23, STL24, STL112 and STL115 carrying in-frame deletions of *bioC*, *bioH*, *bioA* and *bioF*, respectively, were verified as biotin auxotrophs by testing on glucose minimum media plus or minus biotin and the lack of any polarity as demonstrated by complementation with plasmids carrying the gene deleted from the chromosome. Strain STL25 carrying deletions of both the *bioC* and *bioH* genes was constructed by transduction of strain STL23 to kanamycin resistance with a P1 phage stock grown on strain STL29. The *kan* cassette in *bioH* was eliminated by the FLP helper plasmid<sup>2</sup>. The bypass strains STL32, STL33 and STL34 were constructed by transforming strains STL23, STL24 and STL25, respectively, with pYFJ84 which encodes *aasS* under control of a T7 promoter. Strain STL74 was made by transforming STL25 with plasmid pSTL20, which carried the *Bacillus subtilis bioW* gene under control of an *araBAD* promoter.

**Esterification of dicarboxylic acid and analysis.** The dicarboxylic acids and most of their esters were obtained commercially. Those monoesters that were not commercially available were synthesized by one of three methods. Diesters were partially hydrolyzed under basic conditions that gave hydrolysis and transesterification whereas dicarboxylic acid monoesters were synthesized from the dicarboxylic acid by ion exchange resin-catalyzed esterification in a two-phase solution that gives selective monesterification<sup>3</sup> or by a more robust procedure in which acid-catalyzed esterification/transesterification was performed by dissolving the acid to 0.1 M in the anhydrous alcohol plus 0.1 % (v/v) concentrated HCl<sup>4</sup>. These reactions gave mixtures of diester and monoester together with the free dicarboxylic acid with at least half of the products being the monoester as determined by gas chromatography mass spectrometry

(GC/MS) at the Roy J. Carver Metabolomics Center at University of Illinois at Urbana-Champaign. Samples of 1  $\mu$ l were injected with a split ratio of 150:1 on the Agilent GC/MS system consisted of a 5973 MSD, a 7683B autosampler and a 6890N gas chromatograph equipped with a 30 m ZB-WAX capillary column, 0.25 mm I.D. and 250  $\mu$ m film thickness (Phenomenex). Injection temperature and the MSD transfer line were set to 280  $^{\circ}$ C, the ion source and MS quadrupole were adjusted to 230  $^{\circ}$ C and 150  $^{\circ}$ C respectively. The helium carrier gas was set at a constant flow rate of 2 ml min<sup>-1</sup>. The temperature program was: 140  $^{\circ}$ C for 5 min, 40  $^{\circ}$ C min<sup>-1</sup> to 260  $^{\circ}$ C, 265  $^{\circ}$ C for 10 min. Acquired GC/MS spectra were recorded in the m/z 50-800 scanning range and processed using AMDIS (NIST) and MSD ChemStation D.02.00.275 (Agilent) software and compared with standard mass spectrum libraries NIST08 (NIST), WILEY8n (Palisade), and a custom library. The concentrations of the monoester compounds we synthesized were determined by adding a known concentration of an internal standard monoester having a chain length that differed from the monoester of interest by one methylene group.

**BioH Purification.** The C-terminal His-tagged versions of BioH and BioH S82A were over-expressed from strains STL14 and STL47, respectively. The proteins were purified by immobilized-metal affinity chromatography using a nickel-nitrilotriacetic acid column (Ni-NTA) from Qiagen according to the manufacturer's protocol. The cells were resuspended in Loading Buffer (50 mM 3-(N-morpholino)propanesulfonic acid, pH 7.5, 500 mM NaCl, 10 % glycerol and 5 mM 2-mercaptoethanol) containing 10 mM imidazole and lysed by French Press at 17,500 psi. The Ni-NTA column was washed with 20 column volumes of 50 mM imidazole in Loading Buffer. The protein was eluted with 250 mM imidazole in Loading Buffer. The purified proteins were dialyzed in Loading Buffer in Pierce Slide-A-Lyzer dialysis cassette (7000 molecular weight cut-off) and stored at -80  $^{\circ}$ C. The protein concentration was estimated by Bio-Rad protein assay using bovine gamma globulin (Pierce) as standard. The purified proteins were analyzed in sodium dodecyl sulfate 10 % polyacrylamide gel electrophoresis (SDS-PAGE) (**Supplementary Fig. 8**).

**BioC Purification and Refolding.** The C-terminal His-tagged version of BioC was over-expressed as inclusion bodies from strain STL11. The cells were lysed in Lysis Buffer (50 mM

3-(N-morpholino)propanesulfonic acid, pH 7.5, 300 mM NaCl, 10 mM 2-mercaptoethanol, 10 % glycerol, 10 µg/ml of RNase, 10 µg/ml of DNaseI and 10 µg/ml lysozyme) by French Press treatment at 17,500 psi. The insoluble fraction of the cell extract was washed five times in Isolation Buffer (50 mM 3-(N-morpholino)propanesulfonic acid pH 7.5, 1 M NaCl, 0.5 M guanidine-HCl, 10 mM 2-mercaptoethanol, 10 % glycerol, and 5 % Triton X-100) to partially purify BioC inclusion bodies. BioC was solubilized in Solubilization Buffer (50 mM 4-morpholineethanesulfonic acid (pH 6), 1 M NaCl, 4 M guanidine-HCl, 10 % glycerol, 5 mM 2-mercaptoethanol, 5 % sorbitol, 0.05 % Tergitol NP-40, and 10 mM imidazole), purified under denatured condition in Ni-NTA column, and eluted in Solubilization Buffer containing 250 mM imidazole. The denatured BioC was adjusted to 100 µg/ml in 30 ml of Solubilization Buffer and transferred to a 250-ml beaker containing a stir bar. Refolding of BioC was performed by titration by adding 300 ml of Refolding Buffer (Solubilization Buffer lacking guanidine-HCl) to BioC at 25 °C at a rate of approximately 1 drop/sec with constant stirring. The refolded BioC was purified by Ni-NTA column and eluted with Refolding Buffer containing 250 mM imidazole. BioC was dialyzed and stored in Dialysis Buffer (25 mM 4-morpholineethanesulfonic acid, pH 6, 200 mM NaCl, 10 % glycerol and 1 mM 2-mercaptoethanol).

## SUPPLEMENTAL RESULTS

**Table 1.** Compounds tested for bypass of the  $\Delta bioC$  mutation in the presence of AaS. The data set we obtained for each of the compounds tested matched that for the compound given in the mass spectral and NMR databases.

| Compound               | Structure                                                                            | Source          | Analytical   | Bypass |
|------------------------|--------------------------------------------------------------------------------------|-----------------|--------------|--------|
| Malonic acid           | 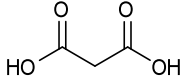   | SA <sup>a</sup> | NMR          | No     |
| Malonate methyl ester  |    | SA              | NMR          | Yes    |
| Malonate ethyl ester   |    | This study      | GC/MS        | Yes    |
| Malonate propyl ester  |    | This study      | GC/MS        | Yes    |
| Malonate butyl ester   |   | This study      | GC/MS        | Yes    |
| Succinic acid          |  | SA              | NMR          | No     |
| Succinate methyl ester |  | This study      | GC/MS        | No     |
| Glutaric acid          |  | SA              | NMR<br>GC/MS | No     |
| Glutarate methyl ester |  | SA              | NMR<br>GC/MS | Yes    |
| Glutarate ethyl ester  |  | This study      | NMR<br>GC/MS | Yes    |
| Glutarate propyl ester |  | This study      | NMR<br>GC/MS | Yes    |
| Glutarate butyl ester  |  | This study      | GC/MS        | Yes    |

|                                 |  |                                  |              |     |
|---------------------------------|--|----------------------------------|--------------|-----|
| 3-Ketoglutarate methyl ester    |  | Derivative from SA <sup>b</sup>  | NMR          | Yes |
| 3-Hydroxyglutarate methyl ester |  | Derivative from SA               | NMR          | Yes |
| Glutaconate methyl ester        |  | Derivative from SA               | GC/MS        | Yes |
| 2-Ketoglutarate methyl ester    |  | Derivative from SA               | GC/MS        | No  |
| Adipic acid                     |  | SA                               | GC/MS        | No  |
| Adipate methyl ester            |  | SA                               | GC/MS        | No  |
| Adipate ethyl ester             |  | This study                       | GC/MS        | No  |
| Hexanoic acid                   |  | SA                               | GC/MS        | No  |
| Pimelic acid                    |  | SA                               | NMR<br>GC/MS | No  |
| Pimelate methyl ester           |  | This study                       | NMR<br>GC/MS | Yes |
| Pimelate ethyl ester            |  | This study                       | GC/MS        | Yes |
| Pimelate propyl ester           |  | This study                       | NMR          | Yes |
| Pimelate butyl ester            |  | This study                       | GC/MS        | Yes |
| 3-Ketopimelate ethyl ester      |  | Derivative from TCI <sup>c</sup> | NMR          | Yes |
| 4-Ketopimelate ethyl ester      |  | Derivative from SA               | GC/MS        | No  |
| Heptanoic acid                  |  | SA                               | NMR          | No  |

|                             |                                                                                      |                                 |       |    |
|-----------------------------|--------------------------------------------------------------------------------------|---------------------------------|-------|----|
| 3-Ketoheptanoic acid        | 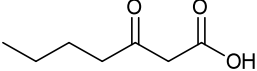   | Derivative from SA <sup>d</sup> | GC/MS | No |
| Suberic acid                |    | SA                              | NMR   | No |
| Suberate methyl ester       |    | This study                      | GC/MS | No |
| Azelaic acid                |    | SA                              | NMR   | No |
| Azelate methyl ester        |    | This study                      | GC/MS | No |
| Sebacic acid                |    | SA                              | NMR   | No |
| Sebacate methyl ester       |    | This study                      | GC/MS | No |
| Undecanedioic acid          |   | SA                              | NMR   | No |
| Undecanedioate methyl ester |  | This study                      | GC/MS | No |

<sup>a</sup> Sigma-Aldrich

<sup>b</sup> Purchased from Sigma-Aldrich as diester and hydrolyzed to monoester.

<sup>c</sup> Purchased from TCI America as diester and hydrolyzed to monoester.

<sup>d</sup> Purchased from Sigma-Aldrich as methyl ester and hydrolyzed to acid.

**Table 2.** Bacterial strains, plasmids and PCR primers.

| <b>Strain</b> | <b>Relevant Characteristics</b>                                                                                       | <b>Reference</b>  |
|---------------|-----------------------------------------------------------------------------------------------------------------------|-------------------|
| MG1655        | <i>E. coli</i> K-12                                                                                                   | CGSC <sup>a</sup> |
| BM25113       | <i>lacI<sup>q</sup> rrnB<sub>T14</sub> ΔlacZ<sub>WJ16</sub> hsdR514 ΔaraBADAH<sub>33</sub> ΔrhaBAD<sub>LD78</sub></i> | 2                 |
| BL21 (DE3)    | F <sup>-</sup> <i>ompT hsdS<sub>B</sub> (r<sub>B</sub> m<sub>B</sub>) gal dcm</i> (DE3)                               | Invitrogen        |
| STL11         | BL21 (DE3) / pSTL4                                                                                                    | This study        |
| STL14         | BL21 (DE3) / pSTL6                                                                                                    | This study        |
| STL23         | MG1655 <i>ΔbioC::FRT</i>                                                                                              | This study        |
| STL24         | MG1655 <i>ΔbioH::FRT</i>                                                                                              | This study        |
| STL25         | MG1655 <i>ΔbioC::FRT ΔbioH::FRT</i>                                                                                   | This study        |
| STL29         | MG1655 <i>ΔbioH::kan</i>                                                                                              | This study        |
| STL32         | MG1655 <i>ΔbioC::FRT</i> / pYFJ84                                                                                     | This study        |
| STL33         | MG1655 <i>ΔbioH::FRT</i> / pYFJ84                                                                                     | This study        |
| STL34         | MG1655 <i>ΔbioC::FRT ΔbioH::FRT</i> / pYFJ84                                                                          | This study        |
| STL47         | BL21 (DE3) / pSTL13                                                                                                   | This study        |
| STL49         | MG1655 <i>ΔbioH::FRT</i> / pSTL6                                                                                      | This study        |
| STL50         | MG1655 <i>ΔbioH::FRT</i> / pSTL13                                                                                     | This study        |
| STL74         | MG1655 <i>ΔbioC::FRT ΔbioH::FRT</i> / pSTL20                                                                          | This study        |
| STL78         | MG1655 <i>ΔbioC::FRT</i> / pET16b                                                                                     | This study        |
| STL96         | MG1655 <i>ΔbioC::FRT</i> / pSTL25                                                                                     | This study        |
| STL98         | MG1655 <i>ΔbioH::FRT</i> / pCY123                                                                                     | This study        |
| STL112        | MG1655 <i>ΔbioA::FRT</i>                                                                                              | This study        |
| STL115        | MG1655 <i>ΔbioF::FRT</i>                                                                                              | This study        |
| ER90          | MG1655 <i>ΔbioF::cat</i>                                                                                              | 5,6               |
| YFJ239        | BL21 (DE3) / pYFJ84                                                                                                   | 7                 |
| DK574 / pJT93 | <i>E. coli</i> holo-ACP over-expression strain                                                                        | 8                 |

  

| <b>Plasmids</b> | <b>Relevant Characteristics</b>                            | <b>Primer set</b> | <b>Reference</b> |
|-----------------|------------------------------------------------------------|-------------------|------------------|
| pET28b+         | Kan <sup>R</sup> T7 expression vector                      |                   | Novagen          |
| pET16b          | Amp <sup>R</sup> T7 expression vector                      |                   | Novagen          |
| pBAD322         | Amp <sup>R</sup> arabinose-inducible expression vector     |                   | 9                |
| pSTL4           | pET28b+ encoding C-terminal His-tagged <i>E. coli</i> BioC | A07-A08           | This study       |



|        |                                                              |         |              |
|--------|--------------------------------------------------------------|---------|--------------|
| pSTL6  | pET28b+ encoding C-terminal His-tagged <i>E. coli</i> BioH   | A11-A12 | This study   |
| pSTL13 | pSTL6 derivative carrying the S82A <i>bioH</i> mutation      | A39-A40 | This study   |
| pSTL20 | pBAD322 encoding <i>B. subtilis bioW</i>                     | A41-A55 | This study   |
| pSTL25 | <i>bioC</i> in-frame deletion ( $\Delta$ BglIII) of pCY123   |         | This study   |
| pYFJ84 | pET16b encoding N-terminal His-tagged <i>V. harveyi</i> AasS |         | <sup>7</sup> |
| pCY123 | pBR329 carrying the <i>bioABFCD</i> operon                   |         | This study   |

| Primers | Sequence (5' to 3')                                                          |
|---------|------------------------------------------------------------------------------|
| A07     | GGTGCTCCATGGCAACGGTTAATAAAC                                                  |
| A08     | GGTGACAAAATAACTCGAGCTCACGAGCAATC                                             |
| A11     | AGAGAACAATAGCTCATGAATAACATCTGGTGG                                            |
| A12     | ATTTCAAAGCCTCGAGCACCCCTCTGC                                                  |
| A15     | GAAATGCAGGATATCGACCGTCTGCTGGAGGTGCTGCATGGCAACGGTT<br>AAGTGTAGGCTGGAGCTGCTTC  |
| A16     | TTACTCACGAGCAATCACTCCCAAAAAAAGATGATACGTCAGAGGATAT<br>CGATTCCGGGGATCCGTCGACC  |
| A17     | ATGAATAACATCTGGTGGCAGACCAAAGGTCAGGGGAATGTTCATCCTG<br>TGATTCCGGGGATCCGTCGACC  |
| A18     | CTACACCCTCTGCTTCAACGCCACCAGCAGGTGACAAAACCTCGGCCGGAT<br>GGTGTAGGCTGGAGCTGCTTC |
| A39     | CCATTTGGTTAGGCTGGGCTCTGGGC                                                   |
| A40     | CACCAGCCCGCCAGAGCCAGCC                                                       |
| A41     | GAAAGGGCGAGCCATGGTGCAAGAAGAAAC                                               |
| A55     | CTTTTTTCTCTCGAGTCATGCGTCATGATCTTCCTC                                         |
| A68     | GCGCTGATGACCCCGGACACCGACGAATCTTACAACGCGGCAGCATAAT<br>GAGTGTAGGCTGGAGCTGCTTC  |
| A69     | ATTAACCGTTGCCATGCAGCACCTCCAGCAGACGGTCGATATCCTGCATT<br>TATTCCGGGGATCCGTCGACC  |
| A70     | TTCTTGTTTGCAGAAAGTGTAGCCAGAAACCCTCACGCGGACTTCTCGTT<br>AGTGTAGGCTGGAGCTGCTTC  |
| A71     | ATGACAACGGCAGATCTTGCCTTTGACCAACGCCATATCTGGCACCCATA<br>CATTCCGGGGATCCGTCGACC  |

<sup>a</sup>CGSC, Coli Genetic Stock Center, Yale University.

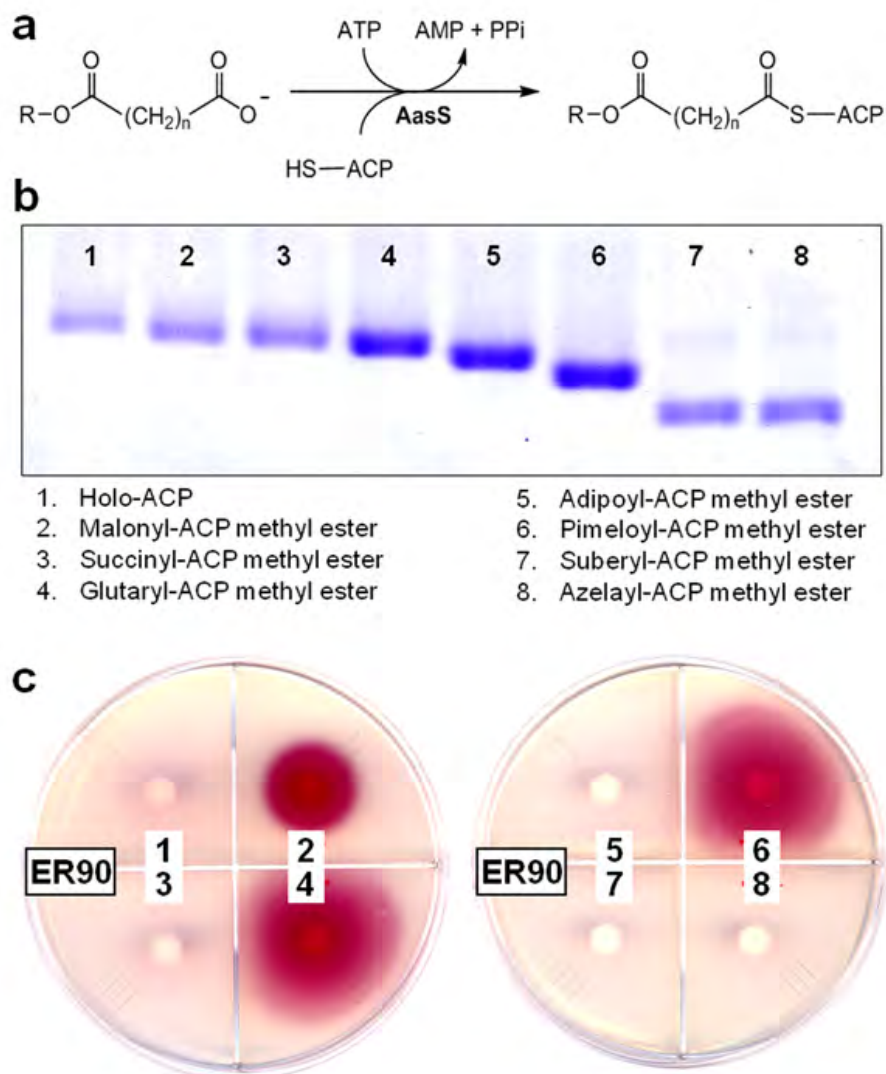

**Figure 1.** (a) Acylation of ACP with monomethyl esters of various dicarboxylates was carried out using *V. harveyi* AasS. The migration rate of an acyl-ACP in this system is dependent on the length of the acyl chain until a maximum is reached<sup>10</sup>. The gel was stained with Coomassie Blue R250 (b). The purified acyl-ACP species of panel B were tested for the ability to support DTB synthesis *in vitro* in the absence of BioC. The acyl-ACPs are numbered as in panel B. (c) Only malonyl-ACP methyl ester (2), glutaryl-ACP methyl ester (4) and pimeloyl-ACP methyl ester (5) supported DTB synthesis.

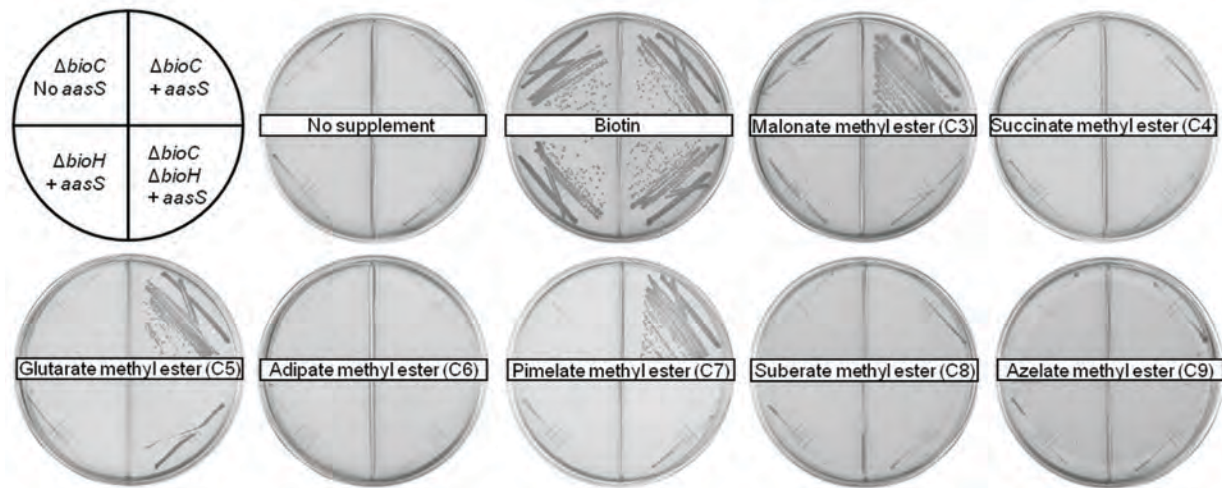

**Figure 2.** AasS-mediated bypass of the  $\Delta bioC$  mutation by supplementation with monomethyl esters of dicarboxylates. Each minimal agar plate contained 0.1 mg/ml sodium ampicillin and 1 mM IPTG. The strain lacking AasS expression carried the empty vector plasmid to provide ampicillin resistance. The methyl esters were tested at nominal concentrations of 0.1 mM except for malonate methyl ester which had a nominal concentration of 1 mM (growth was weak on 0.1 mM). Biotin was added at 4 nM. The plates were incubated overnight at 37 °C. The strains tested were STL78, STL32, STL33 and STL34. Note that the concentrations given are based on the total dicarboxylate of the preparation because the various preparations contain variable levels of the dimethyl esters (which are insoluble in the medium) and the free dicarboxylic acids (which are inactive as AasS substrates). However, the monomethyl ester was the major species in all cases (e.g., **Supplementary Fig. 7**).

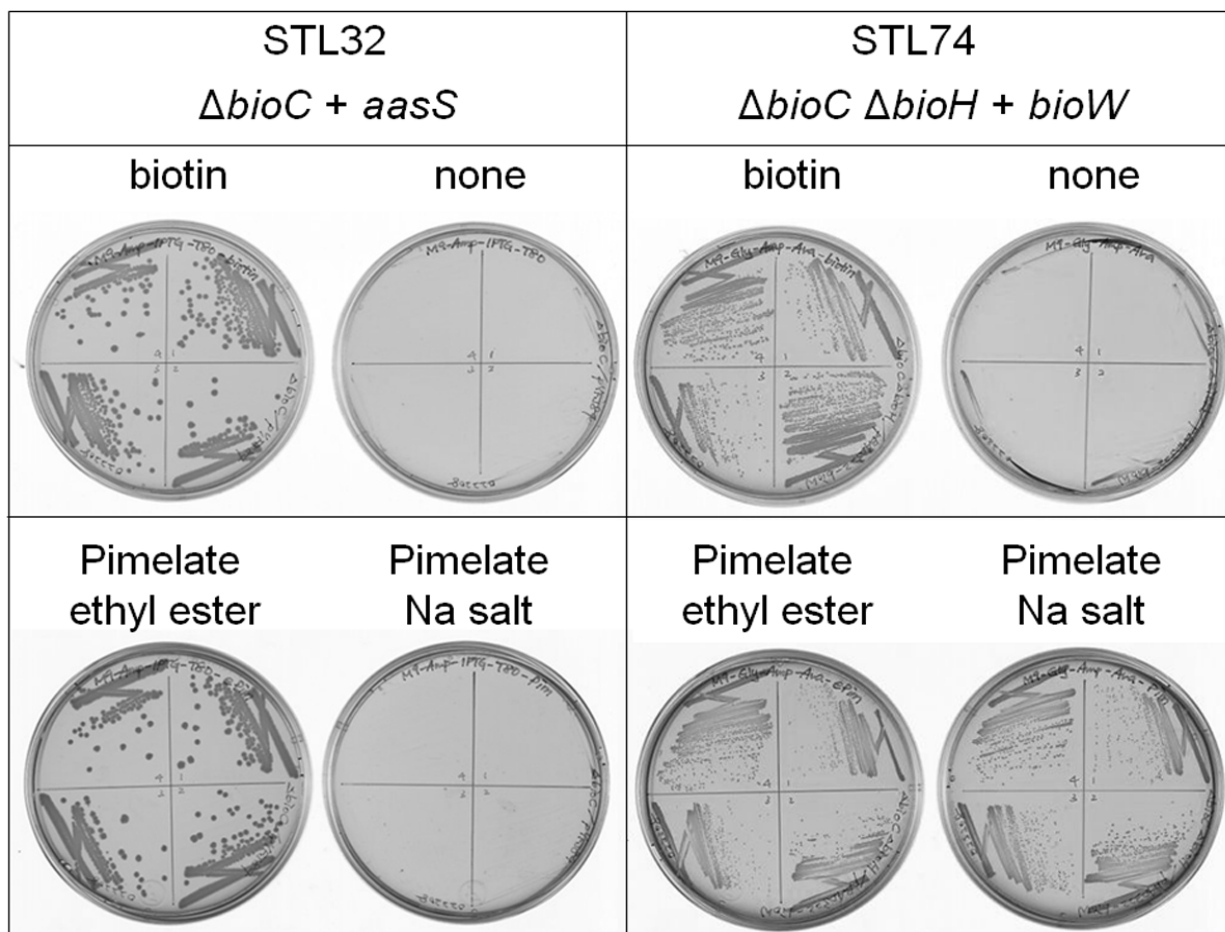

**Figure 3.** The permeability of derivatives *E. coli* strains STL32 and STL74 carrying plasmids encoding either AasS or the *B. subtilis* BioW were tested. Four random colonies of the each strain were streaked on minimal agar supplemented with 0.1 mM pimelate sodium salt and 0.2 % arabinose for induction. The expression of BioW, a pimeloyl-CoA synthetase, allows bypass of both *bioC* and *bioH* in the presence of pimelic acid whereas pimelic acid was unable to support growth of strain STL32 because pimelic acid is not a substrate for AasS.

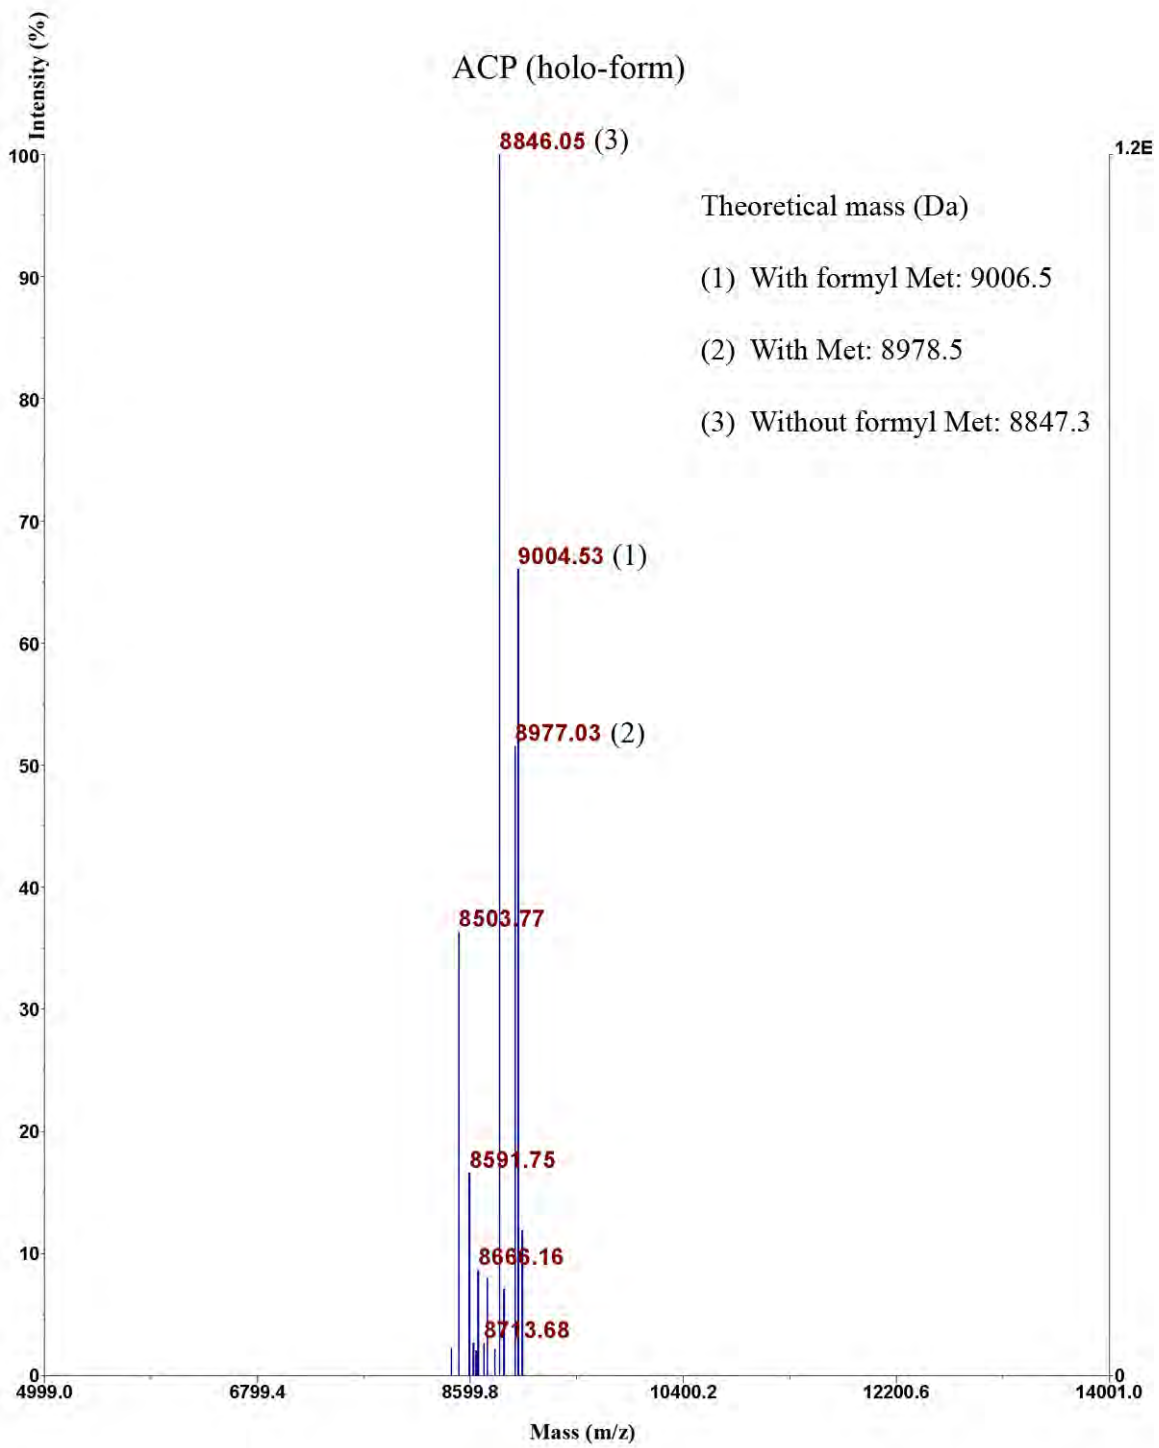

Pimeloyl-ACP methyl ester

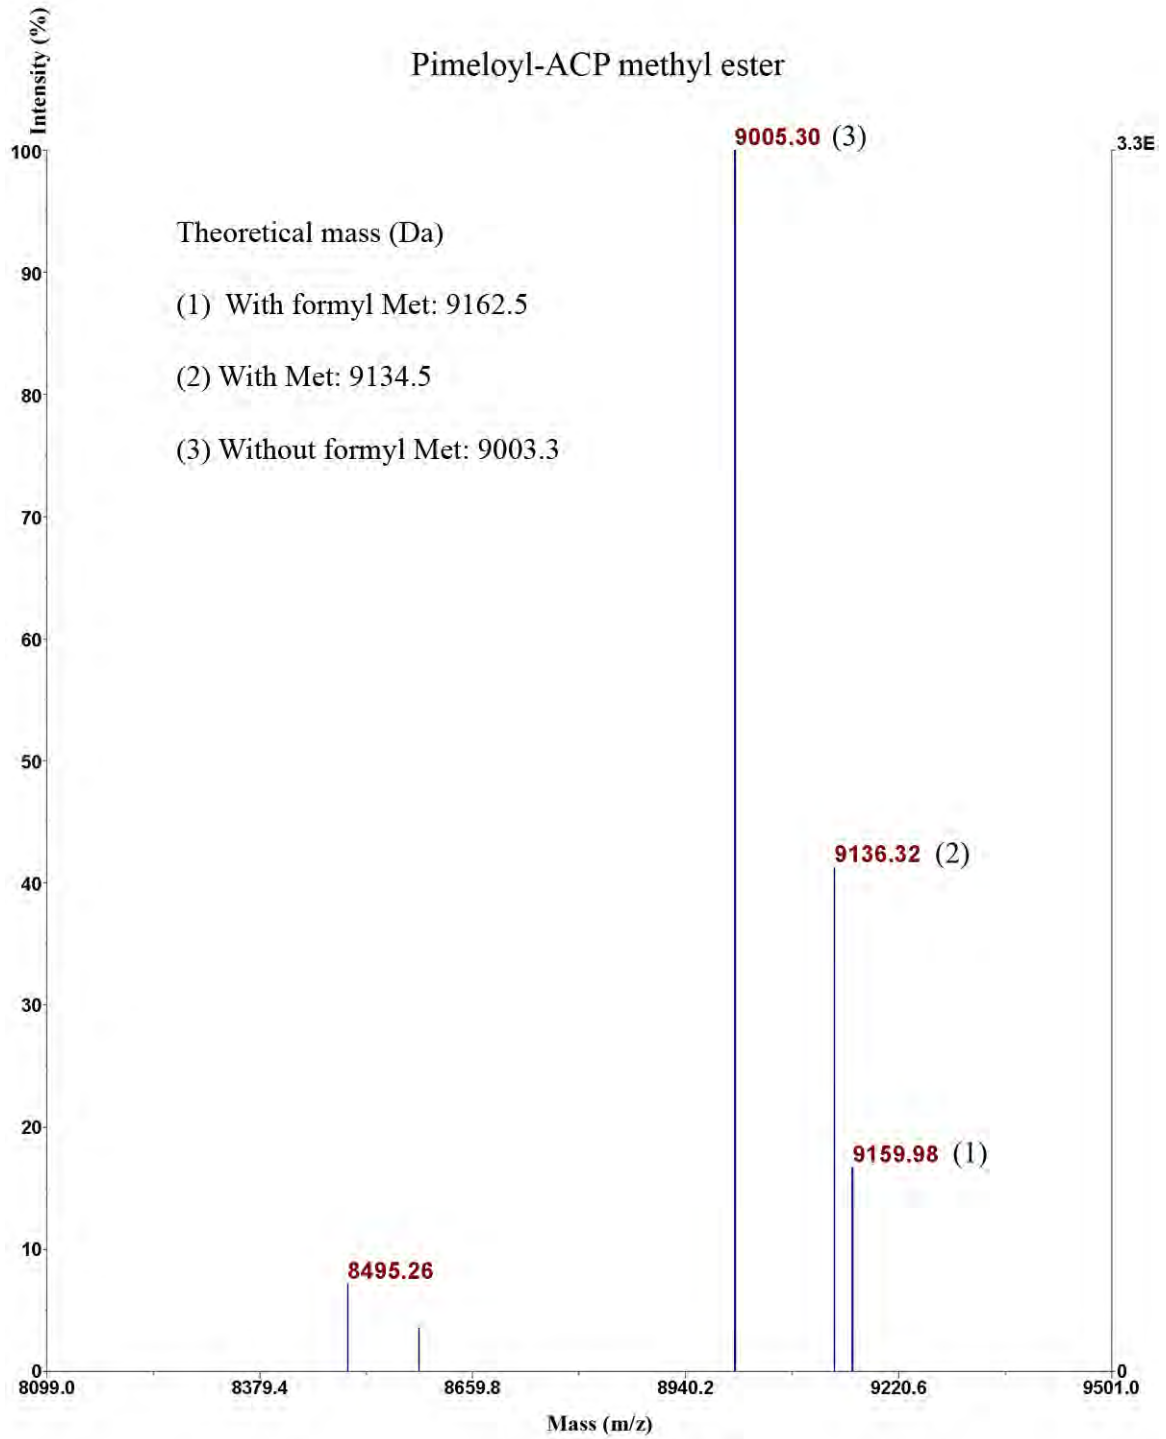

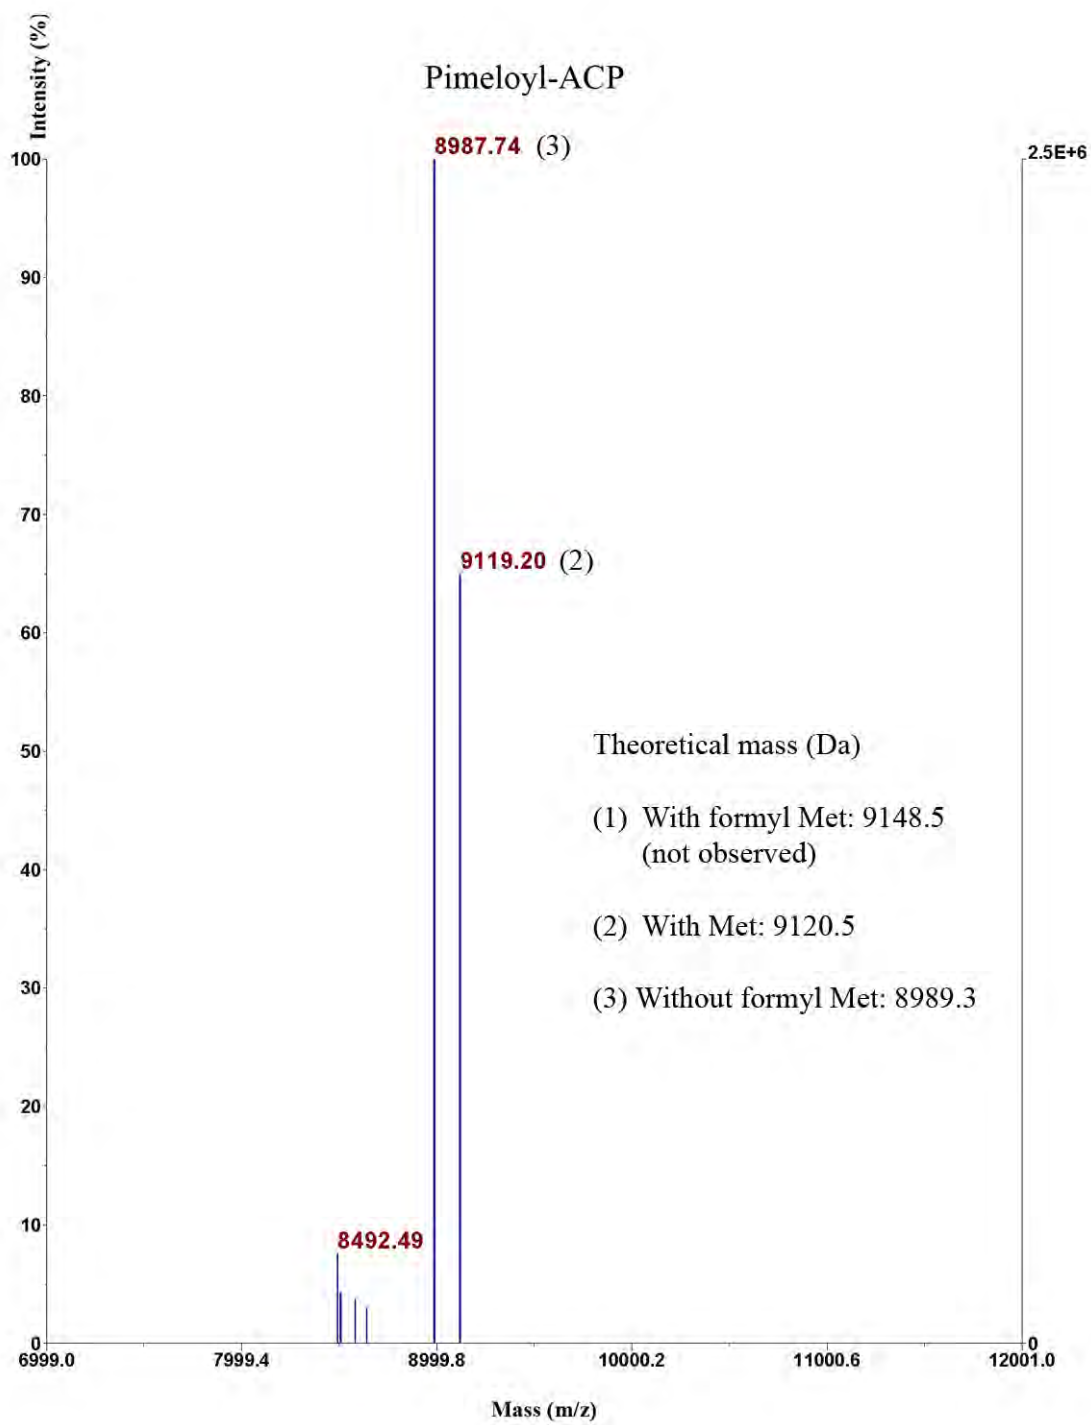

# Glutaryl-ACP methyl ester

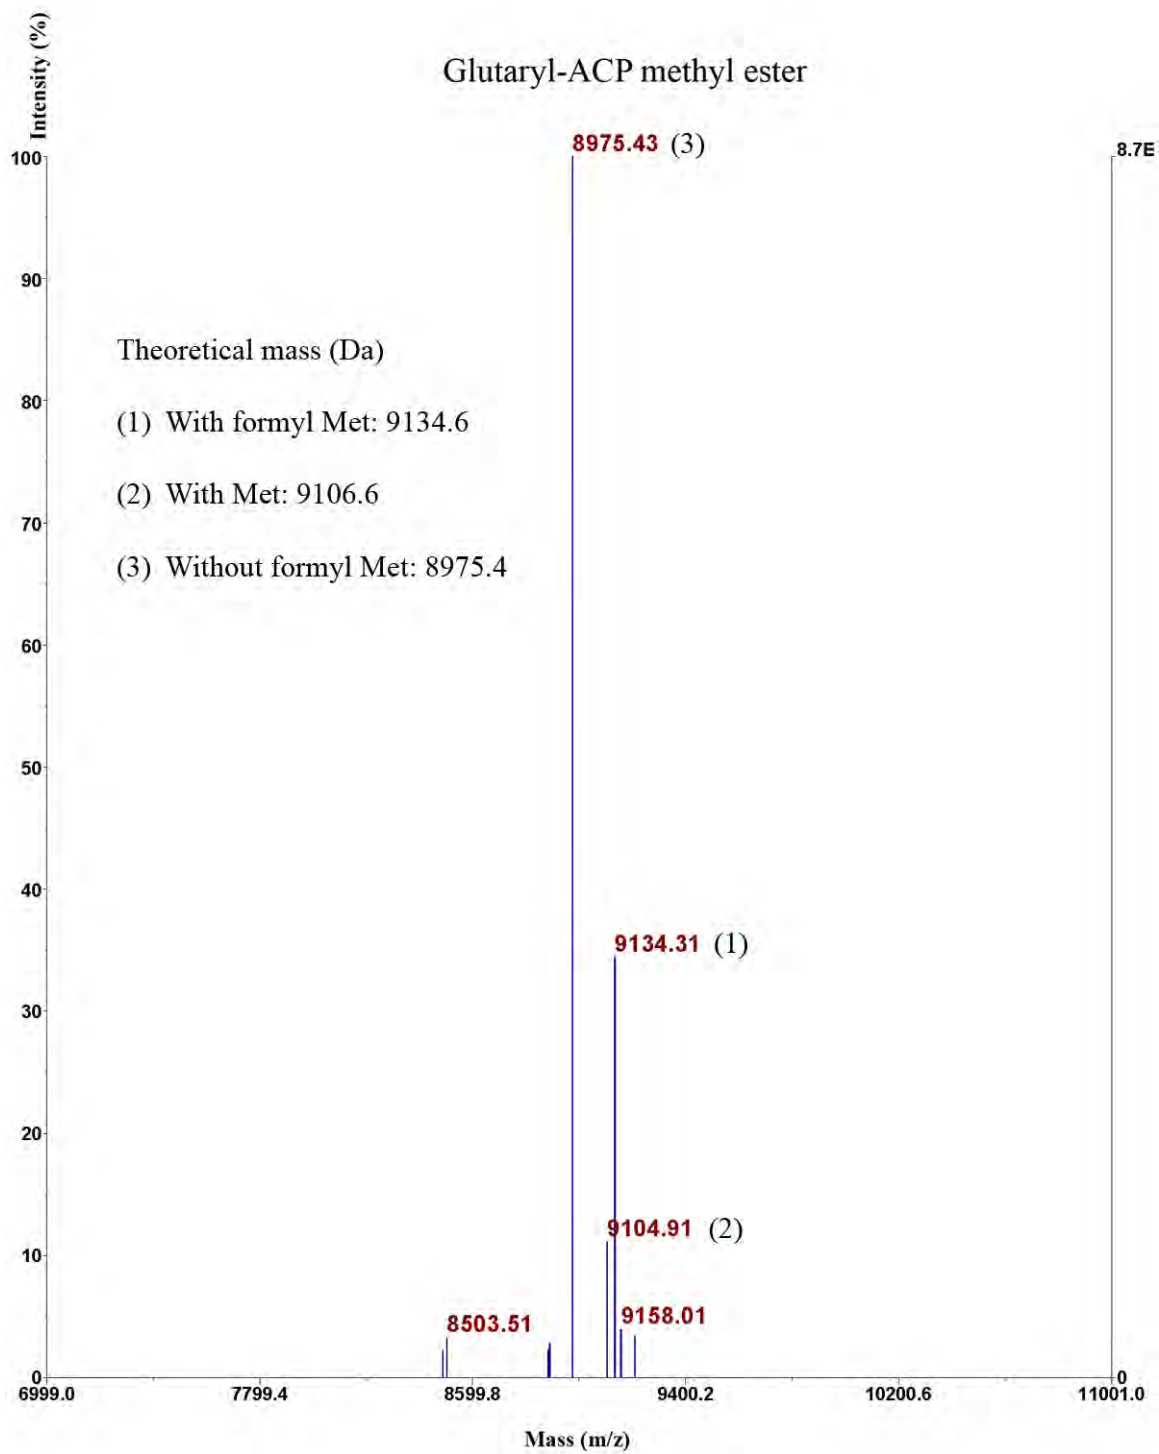



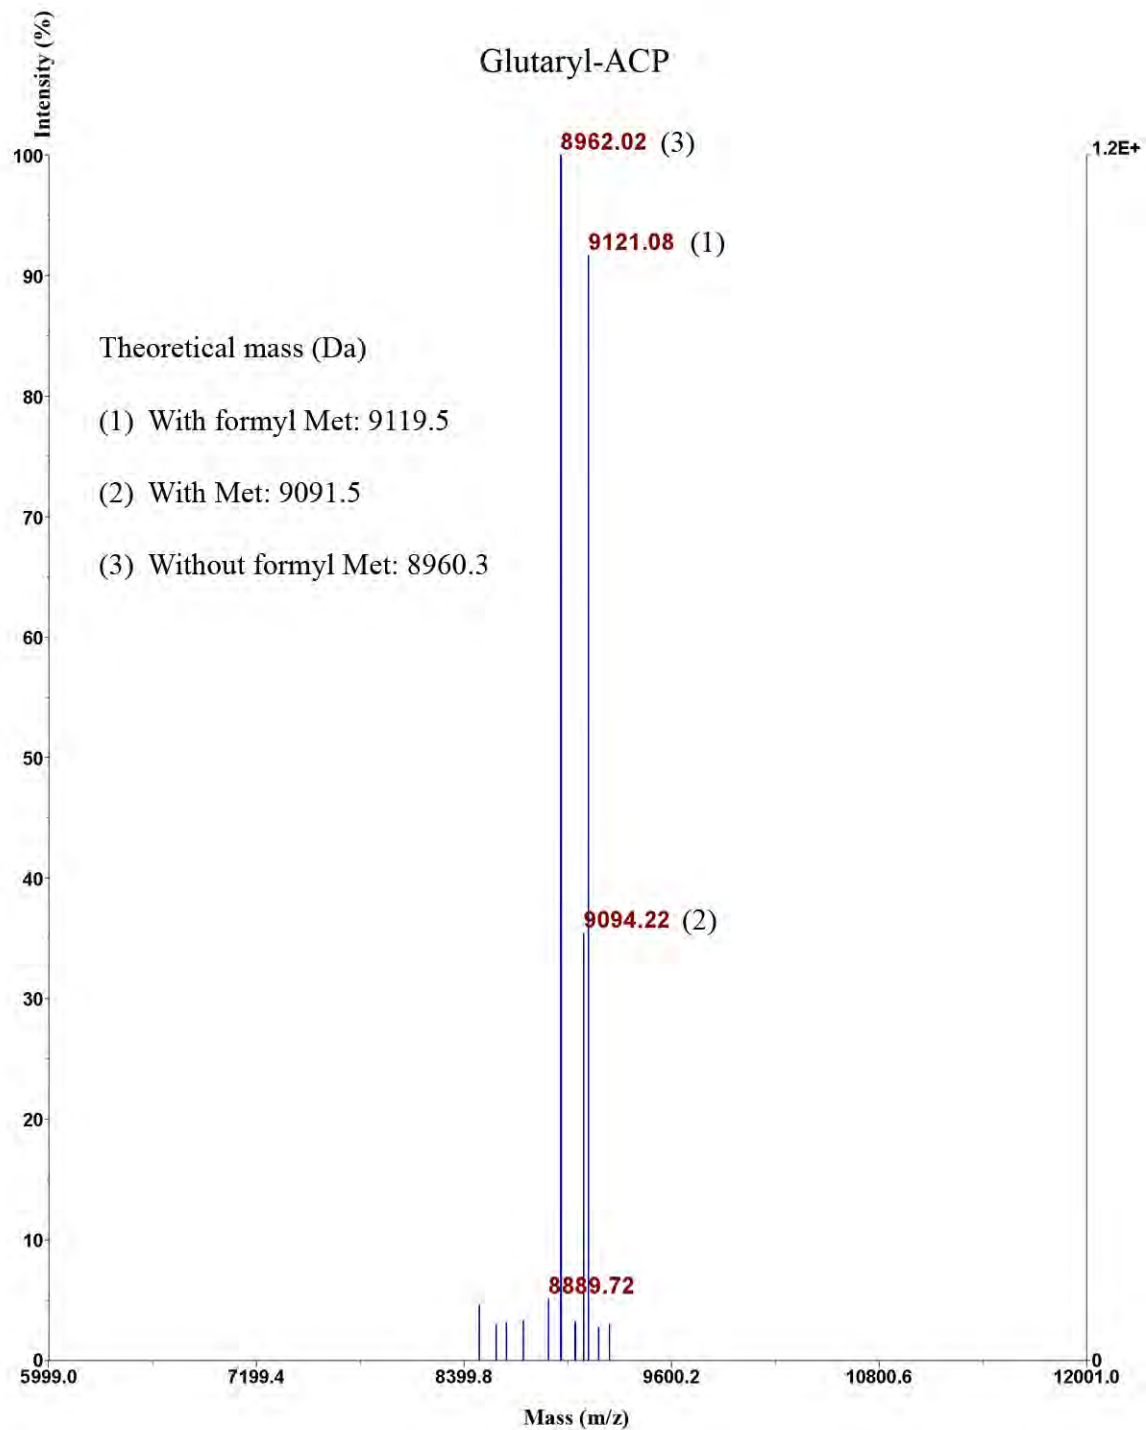

**Figure 4.** Analysis of pimeloyl-ACP and glutaryl-ACP and their methyl esters by MALDI/MS. A portion of the ACP retains the N-terminal N-formylmethionine or methionine of the primary translation product presumably due to titration of peptide deformylase or methionine aminopeptidase upon ACP overexpression.

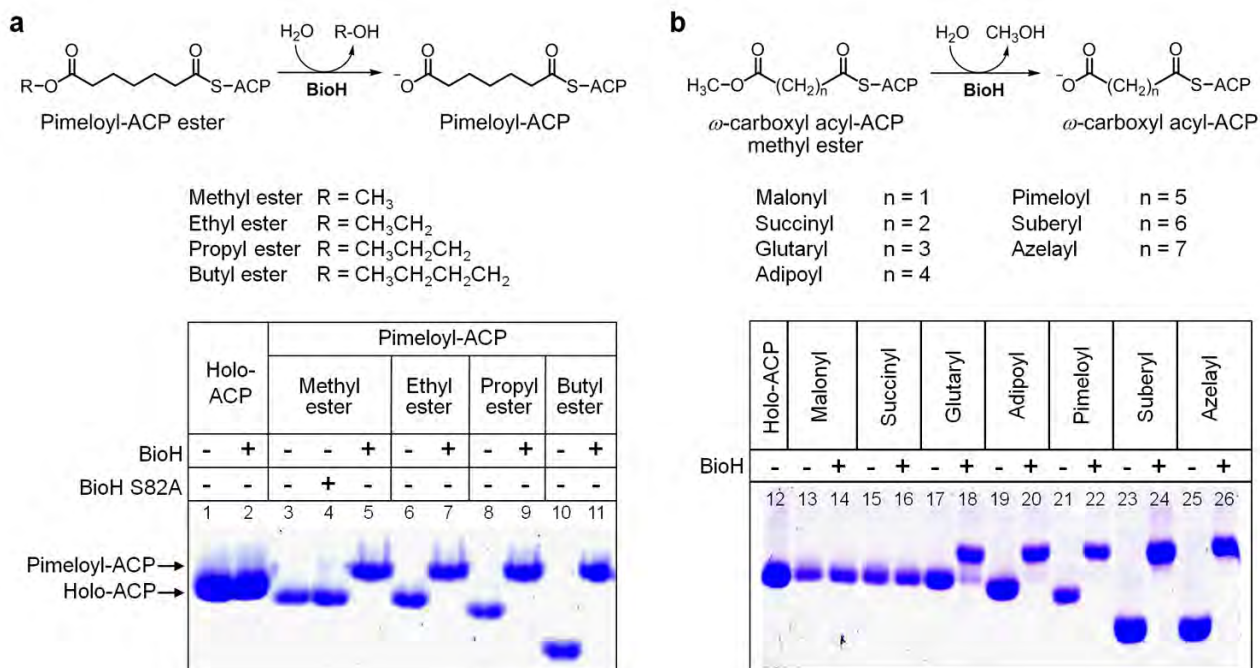

**Figure 5.** (a) BioH catalyzed hydrolysis of the ester bonds of pimeloyl-ACP esters. The reactions contained 50 mM Tris-HCl (pH 7.0), 5 % glycerol, 5  $\mu$ g/ml BioH and 2 mM pimeloyl-ACP esters and were incubated at 37  $^{\circ}$ C for 1 h. Hydrolysis results in the slower migrating pimeloyl-ACP as demonstrated in a conformationally-sensitive electrophoretic mobility assay as described in Experimental Procedures. Mutant BioH S82A lacked the catalytic nucleophile (see text) and was unable to hydrolyze the ester bonds (lane 4). (b) BioH cleavage of the methyl ester moieties of other  $\omega$ -carboxyl acyl-ACP methyl esters of acyl chain length of 3 to 9 carbon atoms. Hydrolysis of the methyl ester bond results in the slower migrating  $\omega$ -carboxyl acyl-ACPs in all cases.

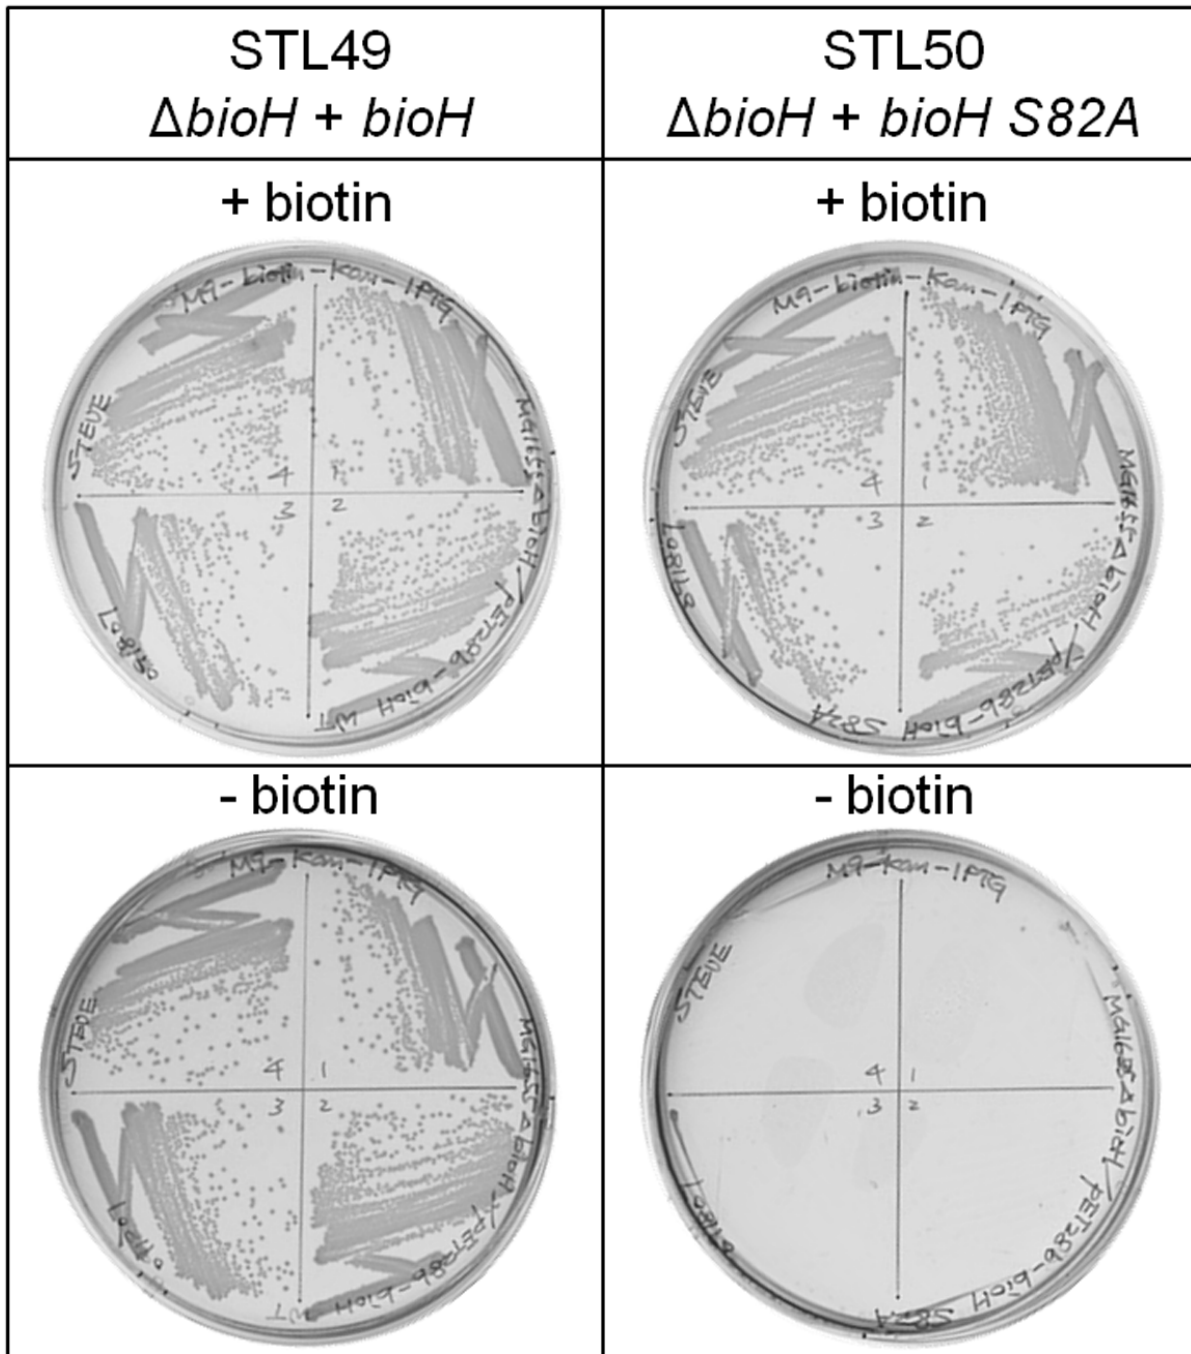

**Figure 6.** Complementation by expression of BioH or BioH S82A from multi-copy plasmids in a *ΔbioH* strain. Four random colonies of the each strain were streaked on minimal agar supplemented with 0.1 mM IPTG for induction. The expression of the wild type BioH allowed growth on biotin-free medium whereas the expression of BioH S82A failed to restore growth.

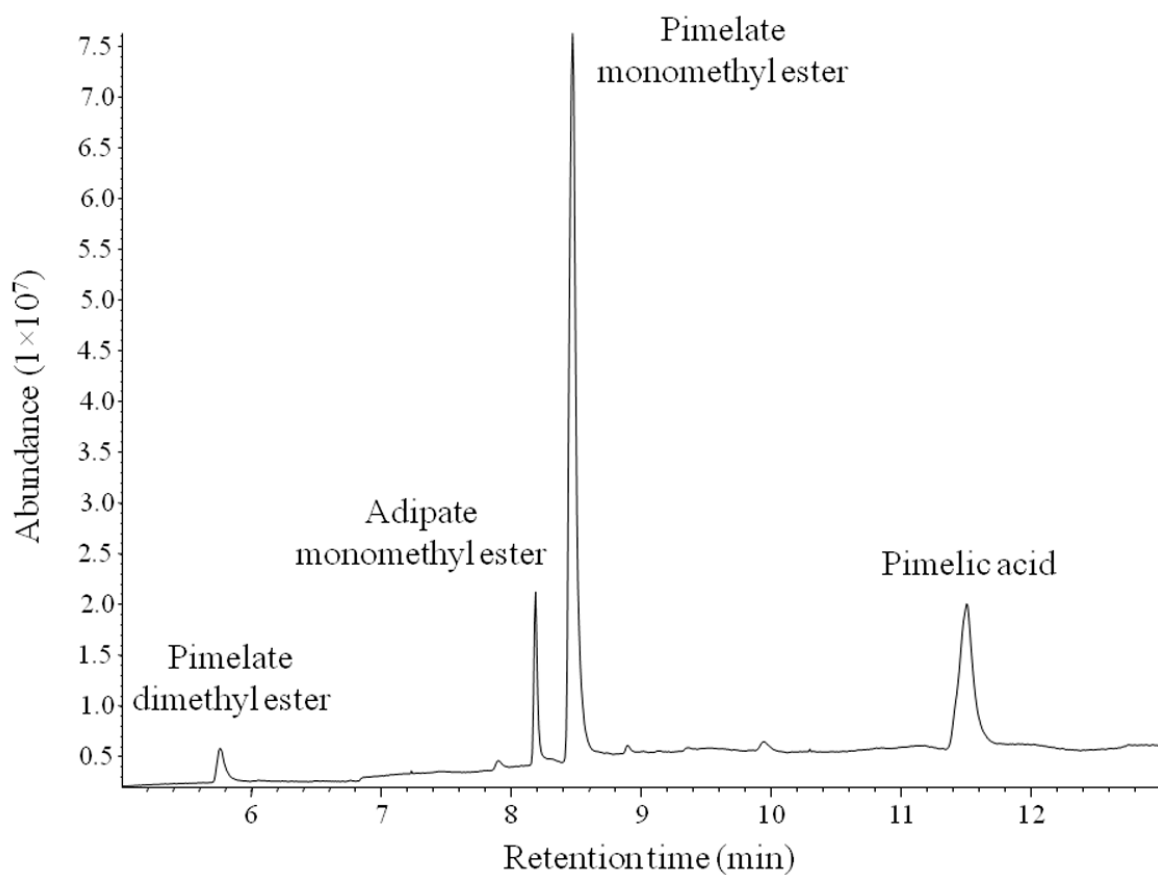

**Figure 7.** Products of the esterification of pimelate with methanol as determined by GC/MS. Monomethyl adipate was added as internal standard at 14 mM to the synthesized monomethyl pimelate mixture. Monomethyl pimelate was 68.9 % of the total pimelate as calculated from the peak areas of the monomethyl esters of adipate and pimelate.

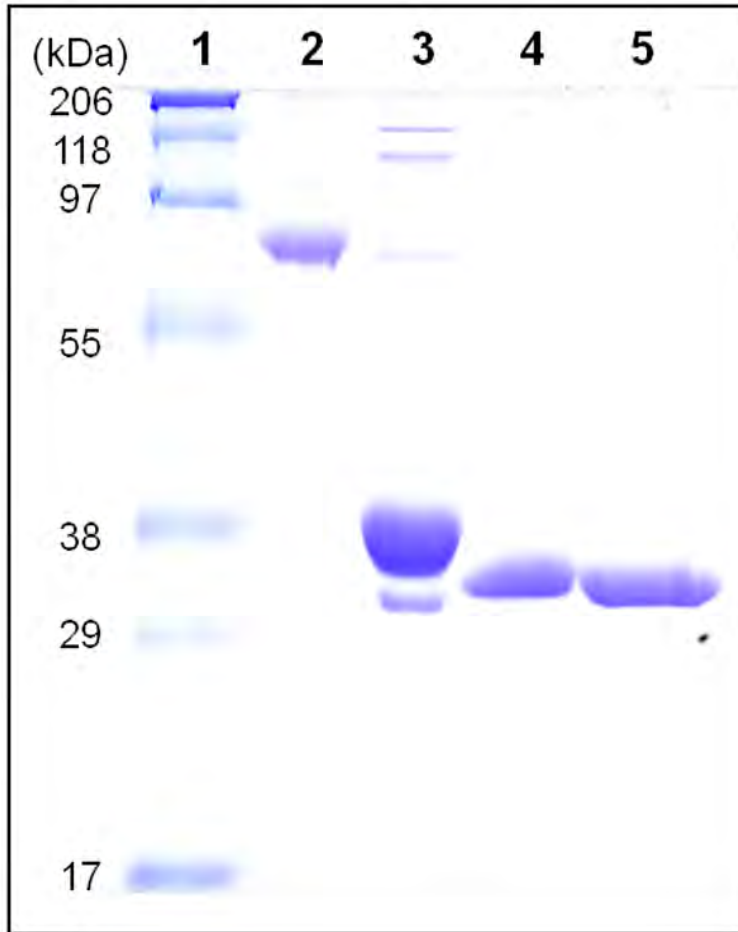

**Figure 8.** Analysis of purified proteins by sodium dodecyl sulfate 10 % polyacrylamide gel electrophoresis. Lane 1, protein standards (Bio-Rad); lane 2, AaS; lane 3, BioC; lane 4, BioH; and Lane 5, BioH S82A. The proteins were visualized by staining the gel with Coomassie Blue R250.

## References:

- 1 Clarke, L. & Carbon, J. A colony bank containing synthetic Col E1 hybrid plasmids representative of the entire *E. coli* genome. *Cell* **9**, 91-99 (1976).
- 2 Datsenko, K. A. & Wanner, B. L. One-step inactivation of chromosomal genes in *Escherichia coli* K-12 using PCR products. *Proc. Natl. Acad. Sci.* **97**, 6640-6645 (2000).
- 3 Saitoh, M., Fujisaki, S., Ishii, Y. & Nishiguchi, T. Convenient selective monoesterification of alpha, omega-dicarboxylic acids catalyzed by ion-exchange resins. *Tetrahedron Lett* **37**, 6733-6736 (1996).
- 4 Furniss, B. S., Hannaford, A. J., Smith, P. W. G. & Tatchell, A. R. *Vogel's textbook of practical organic chemistry*. 5th edn, (Longman Scientific & Technical, 1989).
- 5 Choi-Rhee, E. & Cronan, J. E. A nucleosidase required for in vivo function of the S-adenosyl-L-methionine radical enzyme, biotin synthase. *Chem Biol* **12**, 589-593 (2005).
- 6 Choi-Rhee, E. & Cronan, J. E. Biotin synthase is catalytic in vivo, but catalysis engenders destruction of the protein. *Chem Biol* **12**, 461-468 (2005).
- 7 Jiang, Y., Chan, C. & Cronan, J. E. The soluble acyl-acyl carrier protein synthetase of *Vibrio harveyi* B392 is a member of the medium chain Acyl-CoA synthetase family. *Biochemistry* **45**, 10008-10019 (2006).
- 8 Cronan, J. E. & Thomas, J. Bacterial fatty acid synthesis and its relationships with polyketide synthetic pathways. *Methods Enzymol* **459**, 395-433 (2009).
- 9 Cronan, J. E. A family of arabinose-inducible *Escherichia coli* expression vectors having pBR322 copy control. *Plasmid* **55**, 152-157 (2006).
- 10 Jiang, Y., Morgan-Kiss, R. M., Campbell, J. W., Chan, C. H. & Cronan, J. E. Expression of *Vibrio harveyi* acyl-ACP synthetase allows efficient entry of exogenous fatty acids into the *Escherichia coli* fatty acid and lipid A synthetic pathways. *Biochemistry* **49**, 718-726 (2010).
